# Supplementary material
Source: Springer Nature journal article supplement (https://www.springermedizin.de/resource/supplementary/12903_2009_157_MOESM4_ESM.pdf/9516234)
Supplement: MOESM4 [file 9516234]

**Table 2 Age, meals per day taken, gender, education, dental visit behaviour and caries experience according to risk to dental erosion of the respondents.**

|                             | All        | Risk to dental erosion |            | p-value |
|-----------------------------|------------|------------------------|------------|---------|
|                             |            | Yes*                   | No         |         |
| Age (n = 514)               | 37.1 ± 6.0 | 36.5 ± 6.3             | 37.9 ± 5.5 | 0.008   |
| No. of meals per (n = 494)  | 5.4 ± 2.1  | 5.3 ± 2.0              | 5.5 ± 2.3  | 0.355   |
| Gender (n = 520)            |            |                        |            | 0.441   |
| Male                        | 36%        | 104                    | 82         |         |
| Female                      | 64%        | 175                    | 159        |         |
| Education (n = 517)         |            |                        |            | < 0.001 |
| Primary or below            | 6%         | 13                     | 20         |         |
| Secondary                   | 64%        | 163                    | 167        |         |
| Tertiary                    | 30%        | 103                    | 51         |         |
| Dental check-up (n = 499)   |            |                        |            | 0.212   |
| At least 1/yr               | 22%        | 59                     | 52         |         |
| Less than 1/yr              | 67%        | 176                    | 157        |         |
| Never                       | 11.0%      | 36                     | 19         |         |
| Caries Experience (n = 520) |            |                        |            | 0.086   |
| Yes                         | 78.8%      | 212                    | 198        |         |
| No                          | 21.2%      | 67                     | 43         |         |
